# Supplementary material for: Prolonged Longitudinal Transcutaneous Auricular Vagus Nerve Stimulation Effect on Striatal Functional Connectivity in Patients with Major Depressive Disorder
Source: MDPI journal article supplement (doi:10.3390/brainsci12121730), 2022-12-17
Supplement: s1 [file s1]

## Supplementary material

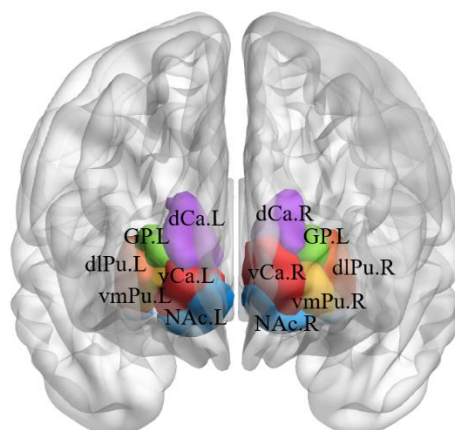

**Figure S1. Distribution of bilateral Striatum.**

vCa, ventral caudate; dCa, dorsal caudate; GP, globus pallidus; NAc, nucleus accumbens; dlPu, dorsolateral putamen; vmPu, ventromedial putamen. L, left; R, right.

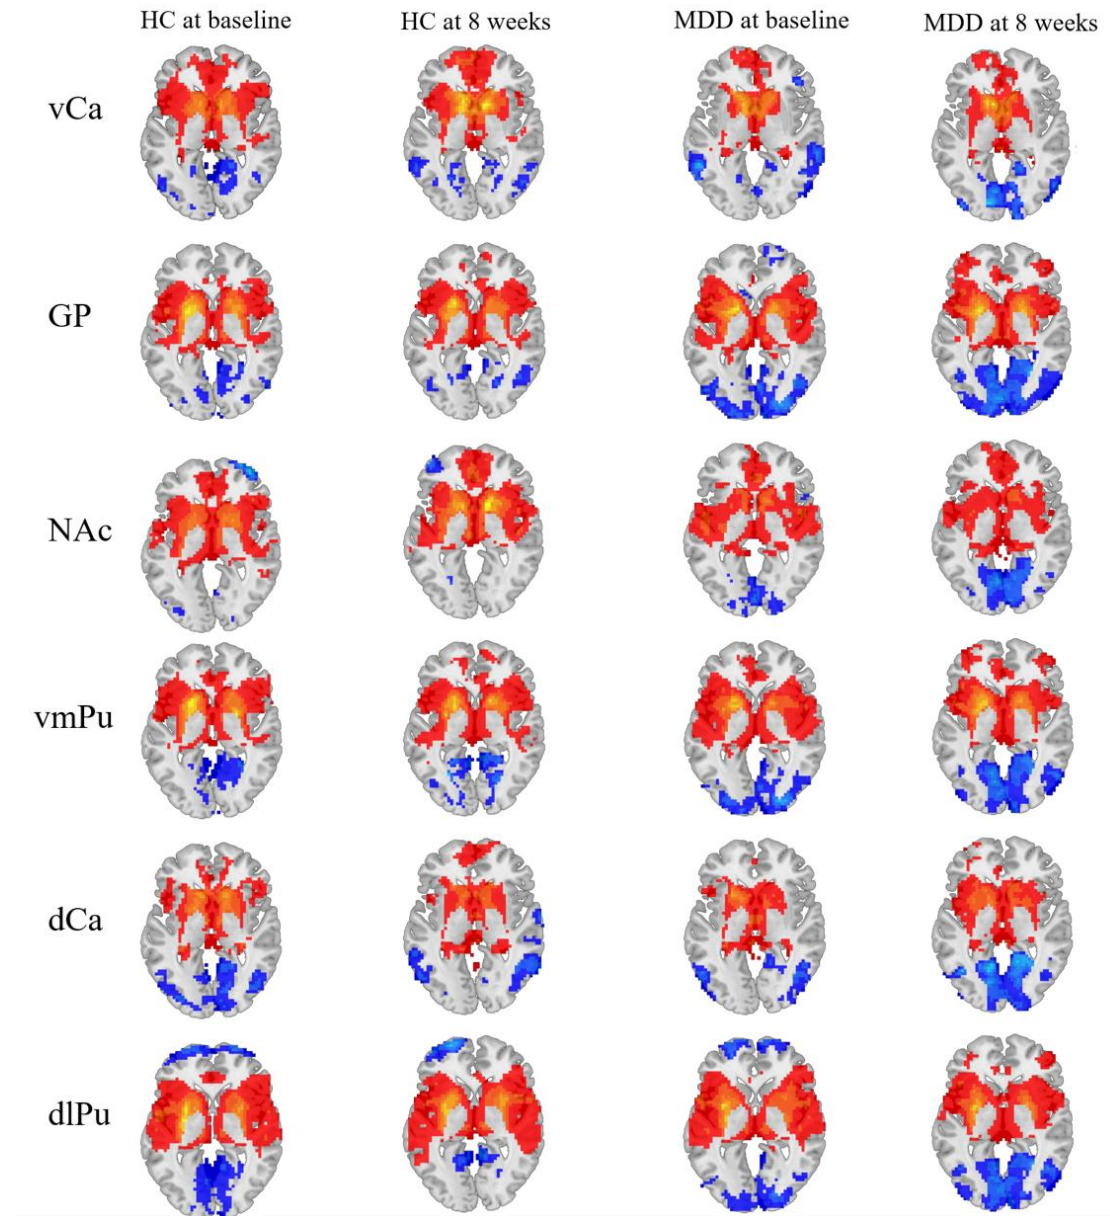

**Figure S2. Within-group patterns of striatal rsFC.**

vCa, ventral caudate; dCa, dorsal caudate; GP, globus pallidus; NAc, nucleus accumbens; dIPu, dorsolateral putamen; vmPu, ventromedial putamen.

Supplementary Table S1. The correlation between the change of clinical symptoms and change of FC (after\_treatment vs. pre\_treatment)

| Improvement of clinical symptoms | The change of the FC | Relation ( $r$ ) | $p$ value |
|----------------------------------|----------------------|------------------|-----------|
| Change of HAMD                   | vCa.L-vPFC.R         | 0.629            | 0.029     |
|                                  | vCa.L-SOG.R          | -0.586           | 0.045     |
|                                  | GP. R-SOG.L          | -0.336           | 0.286     |
|                                  | GP. R-SOG.R          | -0.120           | 0.711     |
|                                  | NAc.L-MTG.L          | -0.093           | 0.774     |
|                                  | NAc.R-dmPFC.L        | -0.247           | 0.439     |
|                                  | NAc.R -dmPFC.R       | -0.372           | 0.234     |
|                                  | NAc.R -vlPFC.R       | -0.304           | 0.337     |
|                                  | dCa.L-Cuneus.R       | -0.287           | 0.365     |
|                                  | dCa.R-dlPu.L         | -0.091           | 0.779     |

Supplementary Table S2. Correlation between changes of clinical symptoms and FC at baseline

| Improvement of clinical symptoms | FC at baseline | $r$    | $p$ value |
|----------------------------------|----------------|--------|-----------|
| Change of HAMD                   | vCa.L-vPFC.R   | -0.336 | 0.285     |
|                                  | vCa.L-SOG.R    | 0.518  | 0.084     |
|                                  | GP. R-SOG.L    | 0.292  | 0.357     |
|                                  | GP. R-SOG.R    | -0.044 | 0.893     |

|  |                 |        |       |
|--|-----------------|--------|-------|
|  | NAc.L-MTG.L     | 0.021  | 0.948 |
|  | NAc.R - dmPFC.L | -0.540 | 0.070 |
|  | NAc.R - dmPFC.R | -0.584 | 0.046 |
|  | NAc.R - vlPFC.R | -0.368 | 0.239 |
|  | dCa.L-Cuneus.R  | 0.189  | 0.557 |
|  | dCa.R-dIPu.L    | 0.453  | 0.140 |

Note: vCa, ventral caudate; vPFC, ventral prefrontal cortex; SOG, superior occipital gyrus; GP, globus pallidus;

NAc, Nucleus accumbens; MTG, middle temporal gyrus; dCa, dorsal caudate; dIPu, dorsolateral putamen; dmPFC,

dorsal medial prefrontal cortex; vlPFC, ventrolateral prefrontal cortex.
